# Supplementary material for: Exploring the utility of social media data for urban flood impact assessment in data scarce cities
Source: Copernicus journal article supplement (doi:10.5194/nhess-2022-109), 2022-04-08
Supplement: Supplementary file 1 [file nhess-2022-109-supplement.zip]

Archive with 12 entries (12 files):
- Supplement/Figure10_1.mp4
- Supplement/Figure10_10.mp4
- Supplement/Figure10_2&3.mp4
- Supplement/Figure10_4_left.mp4
- Supplement/Figure10_4_right.mp4
- Supplement/Figure10_5.mp4
- Supplement/Figure10_6_left.mp4
- Supplement/Figure10_6_right.mp4
- Supplement/Figure10_7.mp4
- Supplement/Figure10_8.mp4
- Supplement/Figure10_9.mp4
- Supplement/video source.pdf
