# Supplementary material for: Exploring the utility of social media data for urban flood impact assessment in data scarce cities
Source: Copernicus journal article supplement (doi:10.5194/nhess-2022-109), 2022-04-08
Supplement: Supplementary file 1 [file nhess-2022-109-supplement.zip › Supplement/video source.pdf]

### **Video source of Figure 10**

Figure 10\_1: <https://v.douyin.com/NpDgNct/>;

Figure 10\_2: <https://v.douyin.com/NpD6gMP/>;

Figure 10\_3: <https://v.douyin.com/NpD6gMP/>;

Figure 10\_4(left): <https://v.douyin.com/NpDqcve/>;

Figure 10\_4(right): <https://v.douyin.com/NpAm3A2/>;

Figure 10\_5: <https://v.douyin.com/NpDjb9w/>;

Figure 10\_6(left): <https://v.douyin.com/NpAKoPL/>;

Figure 10\_6(right): <https://v.douyin.com/NpAcyU4/>;

Figure 10\_7: <https://v.douyin.com/NpDuQhn/>;

Figure 10\_8: <https://v.douyin.com/NpDgNct/>;

Figure 10\_9: <https://v.douyin.com/NpDahF7/>;

Figure 10\_10: <https://v.douyin.com/NpDqcve/>;
